# Supplementary material for: The Shoulder Function Index (SFInX): a clinician-observed outcome measure for people with a proximal humeral fracture
Source: Springer Nature journal article supplement (doi:10.1186/s12891-015-0481-x), 2015-02-17
Supplement: MOESM2 [file 9752174]

## Additional file 2

| <b>Table S1   Focus group participant characteristics</b> |         |                        |                        |       |                       |
|-----------------------------------------------------------|---------|------------------------|------------------------|-------|-----------------------|
| Patients (n=13)*                                          |         |                        | Clinicians (n=15)*     |       |                       |
| Gender                                                    | women   | 10 (77%)               | Gender                 | women | 8 (53%)               |
|                                                           | men     | 3 (23%)                |                        | men   | 7 (47%)               |
| Age (years)                                               |         | 64.5 ± 12.3<br>(44-86) | Age (years)            |       | 39.2 ± 8.8<br>(25-53) |
| Time post-fracture<br>(in weeks)                          |         | 25.9 ± 9.8<br>(10-41)  | Profession             |       |                       |
| Fracture side                                             | Right   | 6 (46%)                | orthopaedic surgeon    |       | 4 (27%)               |
|                                                           | Left    | 7 (54%)                | physiotherapist        |       | 7 (47%)               |
| Treatment                                                 | ORIF    | 2 (15%)                | occupational therapist |       | 4 (27%)               |
|                                                           | Conserv | 11 (85%)               | Experience (years)     |       |                       |
|                                                           |         |                        | orthopaedic surgeon    |       | 10.8 ± 7.7 (5-22)     |
|                                                           |         |                        | physiotherapist        |       | 21.0 ± 8.4 (10-31)    |
|                                                           |         |                        | occupational therapist |       | 6.5 ± 2.7 (4-10)      |

\* Values are no. (%) or Mean ± SD (range)  
ORIF, Open Reduction Internal Fixation; Conserv, Conservative management

| <b>Table S2   Pilot-test sample characteristics (n=12)*</b> |       |                              |
|-------------------------------------------------------------|-------|------------------------------|
| Gender                                                      | women | 11 (92%)                     |
|                                                             | men   | 1 (8%)                       |
| Age (years)                                                 |       | 71.0 ± 10.4 (range 50-86)    |
| Time post-fracture (days)                                   |       | 162.2 ± 101.2 (range 50-359) |
| Fracture side                                               | Right | 4 (33%)                      |
|                                                             | Left  | 8 (67%)                      |
| AO Classification                                           | A     | 1 (n=4), 3 (n=2)             |
|                                                             | B     | 1 (n=6)                      |
| Neer Classification                                         |       | 2GT (n=4), 3GT (n=4)         |
|                                                             |       | 3LT (n=1)                    |
| Hertel Classification                                       |       | 2aSN (n=1), 2bSN (n=2)       |
|                                                             |       | 1 (n=2), 3 (n=4), 7 (n=5)    |
|                                                             |       | 10 (n=1)                     |

\*Values are mean ± SD (range) or number (%) or (number)  
GT, greater tuberosity; LT, lesser tuberosity; SN, surgical neck
