# Supplementary material for: The Shoulder Function Index (SFInX): a clinician-observed outcome measure for people with a proximal humeral fracture
Source: Springer Nature journal article supplement (doi:10.1186/s12891-015-0481-x), 2015-02-17
Supplement: MOESM3 [file 9752174]

# Shoulder Function Index - clinical assessment form

**SFInX score:**

Patient name: \_\_\_\_\_

Time after injury (in weeks): \_\_\_\_\_ Side of injury: L / R

Date of assessment: \_\_\_ / \_\_\_ / \_\_\_\_\_

| Items                                             | Scores                          |                                         |                               |
|---------------------------------------------------|---------------------------------|-----------------------------------------|-------------------------------|
|                                                   | 0                               | 1                                       | 2                             |
| 1 Drinking from a cup                             | <input type="checkbox"/> Unable | <input type="checkbox"/> Able           |                               |
| 2 Washing the opposite armpit                     | <input type="checkbox"/> Unable | <input type="checkbox"/> Able           |                               |
| 3 Washing the back of the opposite shoulder       | <input type="checkbox"/> Unable | <input type="checkbox"/> Partially able | <input type="checkbox"/> Able |
| 4 Combing hair                                    | <input type="checkbox"/> Unable | <input type="checkbox"/> Partially able | <input type="checkbox"/> Able |
| 5 Tucking shirt into pants                        | <input type="checkbox"/> Unable | <input type="checkbox"/> Partially able | <input type="checkbox"/> Able |
| 6 Washing lower back                              | <input type="checkbox"/> Unable | <input type="checkbox"/> Partially able | <input type="checkbox"/> Able |
| 7 Lying on the affected side                      | <input type="checkbox"/> Unable | <input type="checkbox"/> Partially able | <input type="checkbox"/> Able |
| 8 Reaching behind to get an object                | <input type="checkbox"/> Unable | <input type="checkbox"/> Able           |                               |
| 9 Holding an object for a longer period           | <input type="checkbox"/> Unable | <input type="checkbox"/> Able           |                               |
| 10 Carrying a heavier object with two hands       | <input type="checkbox"/> Unable | <input type="checkbox"/> Partially able | <input type="checkbox"/> Able |
| 11 Placing an object on a shelf at shoulder level | <input type="checkbox"/> Unable | <input type="checkbox"/> Able           |                               |
| 12 Sustaining activity above head                 | <input type="checkbox"/> Unable | <input type="checkbox"/> Partially able | <input type="checkbox"/> Able |
| 13 Throwing a ball with two hands over-head       | <input type="checkbox"/> Unable | <input type="checkbox"/> Partially able | <input type="checkbox"/> Able |
| <b>Total number of points (raw score)</b>         | <b>0</b>                        | <b>+</b>                                | <b>+</b>                      |
|                                                   |                                 |                                         | <b>=</b>                      |

### Conversion from raw score to SFInX score

|             |   |    |    |    |    |    |    |    |    |    |    |    |    |    |    |    |    |    |    |    |    |     |
|-------------|---|----|----|----|----|----|----|----|----|----|----|----|----|----|----|----|----|----|----|----|----|-----|
| Raw score   | 0 | 1  | 2  | 3  | 4  | 5  | 6  | 7  | 8  | 9  | 10 | 11 | 12 | 13 | 14 | 15 | 16 | 17 | 18 | 19 | 20 | 21  |
| SFInX score | 0 | 12 | 20 | 27 | 32 | 36 | 40 | 43 | 46 | 49 | 52 | 55 | 58 | 61 | 64 | 67 | 70 | 73 | 77 | 81 | 89 | 100 |
